1 Antifungal tolerance and resistance emerge at distinct drug  
2 concentrations and rely upon different aneuploid chromosomes

3

4

5 Feng Yang<sup>a,b</sup>, Eduardo FC Scopel<sup>b</sup>, Hao Li<sup>a,c</sup>, Liu-liu Sun<sup>a,c</sup>, Nora Kowar<sup>b</sup>, Yong-bing  
6 Cao<sup>d</sup>, Yuan-Ying Jiang<sup>a,#</sup>, Judith Berman<sup>b,#</sup>

7

8

9 <sup>a</sup>Department of Pharmacy, Shanghai Tenth People's Hospital, School of Medicine,  
10 Tongji University, Shanghai, China

11 <sup>b</sup>Shmunis School of Biomedical and Cancer Research, The George S. Wise Faculty of  
12 Life Sciences, Tel Aviv University, Tel Aviv, Israel

13 <sup>c</sup>Department of Physiology and Pharmacology, School of Basic Medicine and Clinical  
14 Pharmacy, China Pharmaceutical University, Nanjing, China

15 <sup>d</sup>Department of Vascular Disease, Shanghai TCM-Integrated Hospital, Shanghai  
16 University of Traditional Chinese Medicine, Shanghai, China

17

18

19 #Address correspondence to [jberman@tauex.tau.ac.il](mailto:jberman@tauex.tau.ac.il) (J.B), and [jiangyy@tongji.edu.cn](mailto:jiangyy@tongji.edu.cn)  
20 (Y-y. J)

21 **Abstract**

22

23 Antifungal drug tolerance is a response distinct from resistance, in which cells grow  
24 slowly above the minimum inhibitory drug concentration (MIC). Here we found that the  
25 majority (69.2%) of 133 *Candida albicans* clinical isolates, including standard lab strain  
26 SC5314, exhibited *temperature-enhanced* tolerance at 37°C and 39°C, and were not  
27 tolerant at 30°C. Other isolates were either *always* tolerant (23.3%) or *never* tolerant  
28 (7.5%) at these three temperatures, suggesting that tolerance requires different  
29 physiological processes in different isolates. At supra-MIC fluconazole concentrations  
30 (8-128 µg/ml), tolerant colonies emerged rapidly at a frequency of  $\sim 10^{-3}$ . In liquid  
31 passages over a broader range of fluconazole concentrations (0.25-128 µg/ml),  
32 tolerance emerged rapidly (within one passage) at supra-MIC concentrations. By  
33 contrast, resistance appeared at sub-MIC concentrations after 5 or more passages. Of  
34 155 adaptors that evolved higher tolerance, all carried one of several recurrent  
35 aneuploid chromosomes, often including chromosome R, alone or in combination with  
36 other chromosomes. Furthermore, loss of these recurrent aneuploidies was associated  
37 with a loss of acquired tolerance, indicating that specific aneuploidies confer fluconazole  
38 tolerance. Thus, genetic background and physiology, and the degree of drug stress  
39 (above or below the MIC) influence the evolutionary trajectories and dynamics with  
40 which antifungal drug resistance or tolerance emerges.

41

42

## 43 **Introduction**

44

45 More than 1.5 million people die from invasive fungal infections every year (Bongomin,  
46 et al. 2017). Increases in the global prevalence of fungal infections has become a major  
47 public health concern (Enoch, et al. 2017). This is largely because the at-risk  
48 population is expanding with the increase in patients with compromised immunity, who  
49 are especially vulnerable to fungal infection and the overall increase in lifespan in  
50 general. For the vast majority of fungal infections, high morbidity and mortality are  
51 caused by species from the genera *Candida*, *Aspergillus* and *Cryptococcus* species  
52 (Bongomin, et al. 2017).

53

54 Only three antifungal drug classes are used clinically for monotherapy: the polyenes,  
55 azoles and echinocandins (Robbins, et al. 2017). Polyenes, such as amphotericin B,  
56 have potent and broad-spectrum antifungal activity and resistance is rarely seen.  
57 However, polyenes can cause severe toxicity in the kidneys and the liver (Carolus, et al.  
58 2020), because they also bind to human cholesterol. Echinocandins are fungicidal  
59 against most *Candida* species and are first-line drugs for the treatment of candidemia  
60 (Pappas, et al. 2016). However, the relatively high cost of echinocandins and the need  
61 to administer them intravenously, makes them inappropriate in many settings. Azoles,  
62 such as fluconazole (FLC), inhibit 14 $\alpha$ -lanosterol demethylase, a key enzyme in  
63 ergosterol biosynthesis. Azoles, which are fungistatic, have broad-spectrum antifungal  
64 activity, good safety profiles, relatively high bioavailability and are more affordable in  
65 many healthcare settings. Therefore, azoles are one of the most widely used antifungal  
66 drugs (Roemer and Krysan 2014; Robbins, et al. 2016).

67

68 The clinical prevalence of FLC resistance in *C. albicans*, a prevalent opportunistic  
69 human fungal pathogen, is generally less than 1% (Pfaller, et al. 2019). Despite this,  
70 therapeutic failure of FLC against susceptible *C. albicans* isolates is often >30% in  
71 systemic infections (Levinson, et al. 2021). The fungistatic nature of azoles allows cells  
72 to survive and to evolve new traits, such as drug tolerance or resistance.

73

74 Since the introduction of first-generation azole drugs in the 1990s, most published  
75 research on drug responses did not distinguish between resistance and tolerance.  
76 Antifungal drug tolerance, which is distinct from resistance, has been best characterized  
77 in *C. albicans* cells responding to FLC ((Rosenberg, et al. 2018) and reviewed in  
78 (Berman and Krysan 2020)). Antifungal drug resistance is the ability to grow well at drug  
79 concentrations above a defined MIC for the drug. Antifungal drug tolerance is defined as  
80 a characteristic of drug-susceptible genotypes that can grow, albeit slowly, at inhibitory  
81 drug concentrations (Fisher, et al. 2022). Furthermore, in a tolerant isolate, not all cells  
82 in the isogenic population grow with similar dynamics. Furthermore, individual clinical  
83 isolates exhibit different levels of FLC tolerance, and the degree of tolerance changes  
84 as a function of growth conditions (Rosenberg, et al. 2018; Levinson, et al. 2021).  
85 However, the degree to which tolerance in different isolates varies across environmental  
86 conditions remains to be characterized.

87  
88 Mechanistically, antifungal resistance is usually due to genetic/genomic mutations that  
89 directly affect the drug-target interaction and these mutations affect the response of all  
90 cells in a population. Antifungal drug tolerance depends upon diverse stress pathway  
91 responses, including heat-shock responses, responses to amino acid starvation,  
92 kinases such as protein kinase C, and epigenetic processes (Berman and Krysan 2020).  
93 Stress pathways presumably enable the slow growth of some cells, and likely affect  
94 drug-target interactions indirectly. However, the mechanisms that affect tolerance and  
95 that distinguish tolerance and resistance are not well understood. Because the  
96 persistence and mortality of fungal infections is associated with high levels of tolerance  
97 (Rosenberg, et al. 2018; Levinson, et al. 2021), we posit that antifungal tolerance, a  
98 property often overlooked in clinical assays, may explain at least some of the treatment  
99 failures caused by clinical isolates that test as susceptible. We also hypothesize that  
100 understanding how genetic and physiological processes that modulate tolerance should  
101 identify new strategies to improve the outcomes of antifungal drug therapies.

102  
103 In this study, we first screened a collection of 133 clinical isolates to determine the  
104 prevalence of FLC tolerance under in vitro lab conditions at normal and at febrile body

105 temperatures. We found three distinct types of temperature responses: 1) *temperature-*  
106 *elevated tolerance* (TET) at 37 and 39°C, relative to 30°C; 2) *always-tolerant* (AT) and  
107 never-tolerant (NT) isolates at the three temperatures. We then evolved representative  
108 TET and AT isolates for adaptation to FLC at a range of drug concentrations. We found  
109 that aneuploidy appears rapidly and is associated with increased tolerance, especially  
110 at drug concentrations above the MIC. By contrast, resistant isolates emerged at sub-  
111 MIC drug concentrations, only after ~5 days of passaging in sub-MIC drug  
112 concentrations and they proceeded to acquire higher resistance levels with time. Some  
113 of the resistant adaptors also acquired aneuploidies, but different ones from those in  
114 tolerant adaptors. This suggests that tolerance and resistance appear with distinct  
115 evolutionary dynamics and trajectories.

116

117

## 118 Results

119

### 120 Most clinical isolates tested were fluconazole-tolerant at physiologically relevant 121 temperatures

122

123 Previously, we found that temperature and medium composition each affected  
124 antifungal tolerance to fluconazole (FLC) and ketoconazole (Rosenberg, et al. 2018; Xu,  
125 et al. 2021). Therefore, we asked about how these two physiological factors affected  
126 one another. Interestingly, the effect of temperature on FLC tolerance was modulated,  
127 sometimes in opposite ways, by medium composition. For example, on RPMI-1640 and  
128 casitone plates, SC5314 was tolerant at *both* 30°C and 37°C, yet on chromagar, SD or  
129 SDC plates, the same strain was not tolerant at *either* 30°C or 37 °C. Interestingly, on  
130 YPD medium (a nutrient-rich medium), SC5314 had *temperature-enhanced* tolerance:  
131 it was *non-tolerant* at 30°C and *tolerant* at 37°C (Fig. S1). Thus, FLC tolerance is  
132 regulated by the interplay between temperature and medium composition.

133

134 To determine the role of temperature in tolerance across a broader set of clinical  
135 isolates, we surveyed 133 clinical *C. albicans* isolates for their susceptibility/resistance  
136 and tolerance levels in YPD medium under standard lab conditions (30°C) and at  
137 normal (37°C) and febrile (39°C) human body temperatures. We used disk diffusion  
138 assays (DDA) analyzed by *diskImageR* (Gerstein, et al. 2016) to measure the  
139 susceptibility/resistance (as the radius of the zone of inhibition (RAD<sub>20</sub>)) and the  
140 tolerance (as the fraction of growth (FoG<sub>20</sub>) in the zone of inhibition relative to growth  
141 outside it) for each strain. For most strains (69.2%), FoG<sub>20</sub> levels were affected by  
142 temperature, with higher tolerance levels at 37°C and 39°C than at 30°C, and little  
143 difference between tolerance levels measured at 37°C vs 39°C (Fig. 1A). The  
144 susceptibility/resistance levels remained similar at the three temperatures. Thus,  
145 tolerance, but not resistance, was affected by both medium composition and  
146 temperature.

147

148 We classified the isolates into three groups based on the effect of temperature on  
149 growth temperature-dependence of the tolerance (FoG<sub>20</sub> values): temperature-  
150 enhanced tolerant (TET), (non-tolerant at 30 °C but highly tolerant at higher  
151 temperatures (n=92, average FoG<sub>20</sub> values of 0.21 ± 0.03, 0.63 ± 0.17, 0.68 ± 0.15, at  
152 30°C, 37°C and 39°C, respectively)); all-temperature tolerant (ATT), which had similar  
153 FoG<sub>20</sub> values at all three temperatures (n=31, FoG<sub>20</sub> values of 0.52 ± 0.12, 0.61 ± 0.15,  
154 0.61 ± 0.15, at 30°C, 37°C and 39°C, respectively); and non-tolerant (NT), which  
155 exhibited only baseline levels of FoG<sub>20</sub> at all three temperatures (n=10, average FoG<sub>20</sub>  
156 values 0.21 ± 0.03, 0.23 ± 0.03, 0.24 ± 0.03, at 30°C, 37°C and 39°C, respectively). At  
157 37°C and 39°C, 92.5% (123 out of 133) of the strains exhibited similar tolerance levels,  
158 while at 30°C, 76.7% (102 out of 133) were not tolerant on the YPD medium (Fig. 1B).  
159 Thus, both body and febrile temperature promoted tolerance on YPD medium in most  
160 isolates.

161

### 162 **Growth dynamics of tolerant cells are similar in a broad range of supra-MIC** 163 **fluconazole concentrations**

164

165 To better characterize the similarities and differences in the drug responses of the  
166 different classes of isolates, we used E-Test® strips to measure susceptibility as the  
167 MIC after 24 h of growth, and spot dilution assays (Xu, et al. 2021), analyzed at 48h, to  
168 measure tolerance. One representative isolate was used for each of the three  
169 temperature-response classes: SC5314 (the *C. albicans* lab strain) for TET, YJB-T1891,  
170 for ATT, and YJB-T490 for NT strain classes. The three isolates had the same MIC  
171 value (1 µg/ml) at 30°C, 37°C and 39°C on YPD (Fig. 2A)). However, plating 10-fold  
172 dilutions in spot assays revealed significant differences in the ability of individual  
173 colonies to grow in the presence of FLC (Fig. 2B). For the TET isolate at 30°C, and for  
174 the NT isolates at all three temperatures, no growth was evident above the MIC,  
175 indicating that they were not tolerant under these conditions. By contrast, the isolates  
176 that exhibited tolerance (the ATT isolate at all three temperatures, and the TET isolate  
177 at 37°C and 39°C) grew similarly at all the drug concentrations tested (up to 128 µg/ml).

178 Thus, for TET and NT tolerant isolates, tolerant growth does not exhibit much  
179 concentration-dependence from 2-128 µg/ml FLC.

180  
181 We investigated the impact of MIC and tolerance on population growth dynamics in the  
182 presence of FLC by plating 100-200 colony-forming units of each isolate on YPD plates  
183 supplemented with FLC at concentrations from 0.25-128 µg/ml. We monitored growth  
184 dynamics at both 30°C and 37°C for 48 h at 30 min intervals using *ScanLag*, which  
185 reports on the time of appearance and growth rates of individual colonies (Levin-  
186 Reisman, et al. 2014; Rosenberg, et al. 2018).

187  
188 At 30°C, colonies from TET isolate SC5314 failed to grow at FLC concentrations above  
189 the MIC (1 µg/ml), while at 37°C, growth was detectable. Colonies of the ATT isolate  
190 (YJB-T1891) grew at both 30°C and 37°C in all FLC concentrations, regardless of the  
191 MIC (1 µg/ml) (Fig. 2C) and for the NT isolate (YJB-T490), no colonies grew at either  
192 30°C or 37°C in the supra-MIC FLC concentrations. These results are consistent with  
193 those from the E-test and spot dilution assays above.

194  
195 *ScanLag* also measures colony growth on agar and reports the time required for a  
196 colony to become detectable on the plate. This time of appearance (TOA) is considered  
197 a proxy of lag phase length (Levin-Reisman, et al. 2014). In all three strain types, at  
198 both 30°C and 37°C, the average colony TOA on drug plates was dose-independent at  
199 drug concentrations below the MIC. Above the MIC, the TOA of isolates that exhibited  
200 tolerance in the spot assays was longer than at sub-MIC drug concentrations, yet was  
201 dose-independent: the whole population appeared with a later TOA at all supra-MIC  
202 concentrations tested. In contrast to TOA, growth rate was dose-dependent at sub-MIC  
203 drug concentrations. Above the MIC, the growth rate, like the TOA, was slower than at  
204 sub-MIC concentrations, yet was drug dose independent. Thus, at supra-MIC drug  
205 concentrations, tolerant cells appeared later, presumably because they have a more  
206 prolonged lag phase, and grew slower than at sub-MIC concentrations. Nonetheless,  
207 these growth properties were similar at concentrations from 2 µg/ml to 128 µg/ml of  
208 fluconazole, consistent with the low degree of concentration-dependence of tolerance.



209

## 210 **Evolution of higher tolerance from cells in the non-tolerant state**

211

212 To ask how a non-tolerant isolate adapts to supra-MIC FLC concentrations, we plated  
213 approximately  $1 \times 10^6$  cells of TET isolate SC5314 and NT isolate YJB-T490 on YPD  
214 plates supplemented with 8  $\mu\text{g/ml}$  to 128  $\mu\text{g/ml}$  FLC. The plates were incubated under  
215 conditions where these isolates were non-tolerant: 30°C for SC5314 and 30°C and 37°C  
216 for YJB-T490. As controls, we plated  $1 \times 10^6$  cells of SC5314 at 37°C and the ATT strain  
217 (YJB-T1891) at 30°C and 37°C on the same range of FLC concentrations. As expected,  
218 all controls produced a lawn of cells. By contrast, the TET strain at 30°C and the NT  
219 strain at both temperatures gave rise to a few hundred to a few thousand colonies  
220 (adaptors) per plate after 5 days on the drug plates (Fig. S2).

221

222 Disk diffusion assays were then performed on 90 randomly selected adaptors from  
223 SC5314 and YJB-T490 parent strains (18 adaptors from each 30°C drug plate). All  
224 these adaptors had a notable increase of increased  $\text{FoG}_{20}$ , indicative of elevated  
225 tolerance (Fig. 3) when tested at 30°C. When tested at 37°C, all SC5314-derived  
226 adaptors (like the SC5314 ancestor) had high  $\text{FoG}_{20}$  (Fig. 3 Top panel), while all YJB-  
227 T490-derived adaptors had low  $\text{FoG}_{20}$  (Fig. 3 Middle panel). Thus, adaptors derived  
228 from SC5314 at 30°C acquired tolerance at 30°C and maintained their tolerance at 37°C,  
229 and adaptors derived from YJB-T490 at 30°C acquired tolerance that was limited to  
230 30°C. By contrast, many adaptors derived from YJB-T490 at 37°C were tolerant at both  
231 30°C and 37°C (Fig. 3 Bottom panel). Thus, depending on the temperature used to  
232 evolve the adaptors, the NT isolate adapted to FLC in two distinct manners: at 30°C  
233 they acquired a new type of conditional tolerance that we term *temperature-sensitive*  
234 *tolerance (TST)* seen only at 30°C and not at 37°C; when evolved at 37°C, NT isolates  
235 acquired tolerance that was detectable at both 30°C and 37°C, a phenotype akin to that  
236 of other ATT-like adaptors.

237

## 238 **Recurrent aneuploidy enables the acquisition of fluconazole tolerance**

239

240 To identify genomic mechanisms by which the SC5314 and YJB-T490-derived adaptors  
241 acquired tolerance, we performed deep sequencing of 18 independent adapted isolates  
242 for the TET and NT strains collected at 30°C on 8 µg/ml, 32 µg/ml, and 128 µg/ml of  
243 fluconazole. Taken together, 54 adaptors derived at 30°C from TET and NT isolates  
244 were sequenced.

245  
246 Aneuploidy was prevalent among the adaptors. Out of the 54 TET-derived adaptors,  
247 one (FY9) that appeared on 8 µg/ml FLC plate grew poorly and was excluded from  
248 sequencing and further analysis. From the others, 50 (94.3%) were aneuploid (Fig. S3)  
249 and three were euploid. Among the 54 NT-derived adaptors at 30°C, 52 (96.3%) were  
250 aneuploid (Fig. S4) and two were euploid. Four of the five euploid adaptors (from TET-  
251 and NT-derived) appeared at 8 µg/ml FLC, the lowest selective drug concentration  
252 tested.

253  
254 Analysis of the karyotypes revealed several recurrent aneuploidies, several of which  
255 were seen in both the TET- and NT-derived isolates. The most prevalent adaptors (35  
256 TET adaptors; 27 NT adaptors) had aneuploidy involving ChrR, either as trisomy of the  
257 whole chromosome (ChrRx3) (9 from TET, 10 from NT), monosomy of the left arm distal  
258 to the rDNA repeats (SegChrRx1) (6 from TET), or trisomy of ChrR from rDNA repeats  
259 to the right telomere (SegChrRx3) (12 from NT), or a combination of SegChrRx3 and  
260 SegChrRx1 (10 from TET). These ChrR aneuploidies appeared alone or in combination  
261 with trisomy of other chromosome(s) (Chr4 or Chr7 in TET adaptors; any combination of  
262 Chr4 and Chr6 trisomy alone or together with trisomy of Chr7 in NT adaptors) (Fig. 4).  
263 Five TET adaptors and 19 NT adaptors had aneuploidy of chromosome(s) other than  
264 ChrR. The 5 TET adaptors had a single additional aneuploidy: SegChr1x1, Chr4x3,  
265 Chr4x4, SegChr5x1, or Chr6x3, (Fig. S3). Among the 19 NT adaptors, only one had a  
266 single aneuploid chromosome (Chr5x1) and this monosomic strain grew very slowly.  
267 The remaining 18 adaptors had at least two aneuploid chromosomes, mostly Chr4x3  
268 together with Chr6x3 (Fig. S3 and summarized in Fig. 4).

269

270 Taken together, NGS revealed 21 different karyotypes among the 50 TET-derived ATT-  
271 like aneuploid adaptors, and 17 different karyotypes among the 53 NT-derived TST  
272 aneuploid adaptors. Despite differences in genetic background and FLC concentration  
273 used for selection, the same aneuploidies (predominantly ChrRx3 or SegChrRx3) were  
274 recurrently associated with the emergence of FLC tolerance. This occurred in both the  
275 ATT types derived from TET ancestral isolates and the TST types derived from NT  
276 ancestral isolates.

277  
278 The NT-derived adaptors obtained at 37°C also had diverse karyotypes. Each of the  
279 nine sequenced NT→ATT adaptors had a unique karyotype that was *not* seen in the  
280 NT→TST adaptors obtained at 30°C (Fig. 4): 7 had amplification of Chr6 alone (n=1) or  
281 in combination with aneuploidy (mostly trisomy) of one or more other chromosomes  
282 (n=6). Only two NT→ATT adaptors did not have Chr6 aneuploidy: one adaptor had  
283 SegChr1x1 alone, and one had SegChr2x1 alone.

284  
285 Taken together, the karyotypes of the adaptors were FLC dose-independent but  
286 temperature-dependent. At 30°C, the TET- and NT-derived adaptor karyotypes involved  
287 recurrent ChrR amplification in TET→ATT and NT→TST adaptors selected across the  
288 range of FLC concentrations used. By contrast, from selection at 37°C, NT→ATT  
289 adaptors had distinctly different aneuploid adaptors: predominantly Chr6 trisomy and  
290 tetrasomy, alone or in combination with another aneuploid chromosome. Thus, selection  
291 at 30°C yielded similar karyotypes with different tolerance temperature responses in  
292 different strain backgrounds. Moreover, different selection temperature (30°C vs 37°C)  
293 yielded different karyotypes in the same strain background (NT→TST vs NT→ATT) (Fig.  
294 3 and Fig. 4).

295  
296 **Loss of aneuploidy is associated with loss of acquired fluconazole tolerance.**

297  
298 Whole chromosome aneuploidies can be gained and lost through mitotic  
299 missegregation. Previously we found that reversible chromosome gain and loss affected  
300 general fitness and drug responses in *C. albicans* (Yang, et al. 2019; Yang, Todd, et al.

301 2021). Here, we asked if the FLC tolerance associated with recurrent aneuploidy was  
302 also unstable. Adaptors with different aneuploidies were spread onto YPD (without drug)  
303 and grown at 30°C for 36h. All yielded a mixture of colony sizes, with primarily small (S)  
304 and some large (L) colonies (Fig. 5A), although the frequency of appearance of L  
305 colonies was different for different aneuploids. We randomly selected one S and one L  
306 colony from each strain and tested them by DDA at 30°C.

307  
308 To ask if point mutations had any role in the acquisition of tolerance, we performed  
309 variant calling to identify any SNPs of moderate to high effect (missense, nonsense,  
310 frameshift) that passed our qualify filters (see Materials and Methods) in the small  
311 (aneuploid) and large colonies of the tolerant adaptors (Table S1). Small and Large  
312 colonies from the same parent shared 14 SNPs. We assume that these SNPs were  
313 acquired during selection on fluconazole and were not drivers of tolerance. Taken  
314 together, in six tolerant adaptors representative of the six different karyotypes, we found  
315 variants that caused missense mutations in 23 genes. None of them were significantly  
316 (FDR > 0.1) enriched for gene ontology (GO) terms. Twelve genes were not annotated  
317 to any biological process, and 14 genes had unknown molecular functions. None of the  
318 SNPs found here were in genes encoding known or predicted drug efflux pumps or in  
319 known ergosterol biosynthesis enzymes or regulators.

320  
321 Importantly, all the S colonies retained the higher tolerance seen in their parent strain  
322 and remained aneuploid like the adaptors from which they were derived. By contrast, all  
323 the L colonies were no longer tolerant (Fig. 5B) and had lost the aneuploid  
324 chromosome(s) to become euploid (Fig. 5C). This strong correlation, between the  
325 presence of aneuploidy and tolerance in all the S and loss of aneuploidy and tolerance  
326 in all the L progeny, supports the idea that the aneuploidies acquired during passaging  
327 on fluconazole were the major drivers of tolerance in the original adaptors. Because  
328 only some aneuploid chromosomes associated with tolerance, we presume that these  
329 aneuploidies appeared, in some cases recurrently, because they provide a selective  
330 advantage in the presence of drug (Janbon, et al. 1998; Selmecki, et al. 2008; Yang, et

331 al. 2013; Yang, et al. 2019; Yang, Gritsenko, Lu, et al. 2021; Yang, Gritsenko, Slor  
332 Futterman, et al. 2021).

333

### 334 **Evolutionary trajectories differ at sub-MIC versus supra-MIC fluconazole** 335 **concentrations**

336

337 Because the TET and NT isolates acquired tolerance, but not resistance, when exposed  
338 to supra-MIC concentrations of FLC on solid medium, we next asked if this was a  
339 function of the FLC concentration. Therefore, we evolved one TET isolate (SC5314) and  
340 one NT isolate (YJB-T490) by passaging them daily (1:1000 dilutions) in YPD broth  
341 supplemented with FLC ranging from 4X below the MIC (0.25 µg/ml) to 128X above the  
342 MIC for a total of 15 days. As a control, we also passaged the isolates in YPD without  
343 drug.

344

345 Every five days an aliquot of each culture was washed, diluted, and ~ 200 cells were  
346 spread onto a YPD plate. In general, ~ 100 to 200 CFU appeared on the plates within  
347 24h. We then randomly selected 18 or 96 colonies, from the TET and NT cultures,  
348 respectively. We always aimed to randomly select similar numbers of large, medium,  
349 and small colonies from each culture/drug concentration and tested their responses to  
350 FLC on disk diffusion assays. In total, we measured resistance ( $Rad_{20}$ ) and tolerance  
351 ( $FoG_{20}$ ) for 18 and 96 TET and NT derivatives per day of passage (1, 5, 10, and 15  
352 days) and per drug concentration (0, 0.25, 0.5, 1, 2, 4, 8, 16, 32, 64 and 128 µg/ml  
353 fluconazole) for a total 792 (SC5314 derivatives) and 4224 (YJB-T490 derivatives)  
354 measurements, respectively (Fig 6A and 6B).

355

356 For SC5314 (MIC ~ 1µg/ml FLC), among the 504 adaptors evolved at supra-MIC  
357 concentrations (2-128 µg/ml FLC), most exhibited tolerance (increased  $FoG_{20}$ ), while  
358 *none* of the adaptors acquired increased fluconazole resistance (Fig. 6A). In fact, some  
359 adaptors were *more susceptible* to fluconazole, as evidenced by a *larger*  $RAD_{20}$  (and  
360 thus a lower  $MIC_{20}$ ) than the parent strain. Similarly, for YJB-T490 (MIC ~ 0.75-1 µg/ml),  
361 most of the 2688 adaptors evolved at supra-MIC concentrations (2-128 µg/ml), exhibited

362 tolerance, and *none* exhibited resistance (Fig. 6B). Interestingly, both the frequency with  
363 which tolerance arose and the range of tolerance levels achieved were similar at all the  
364 supra-MIC concentrations used for passaging (Fig. 6A). This suggests that once the  
365 drug inactivated its target, additional drug had little if any effect on how often or how  
366 much tolerance emerged.

367  
368 At the MIC, SC5314 adaptors gained either resistance or tolerance (but not both) after 5  
369 and 10 passages, while only resistant isolates appeared after 15 days of passaging at  
370 the MIC. Thus, it appears that at the MIC, SC5314 adaptors that were tolerant after 5  
371 and 10 passages became resistant after 15 passages. Furthermore, there was stepwise  
372 increase in the level of resistance in adaptors evolved for 5, 10 and 15 days in 1 µg/ml  
373 FLC (Fig. 6A and Fig. S5). For YJB-T490 adaptors, only tolerant isolates were detected  
374 at the MIC. In some assays, the MIC of YJB-T490 is slightly lower than that of SC5314,  
375 and thus 1 µg/ml may be slightly higher than the actual MIC for this strain.

376  
377 At sub-MIC concentrations (0.25 and 0.5 µg/ml), SC5314 adaptors became either  
378 resistant (decreased RAD<sub>20</sub>) or tolerant (increased FoG<sub>20</sub>) (but not both). Among the  
379 adaptors evolved in 0.25 µg/ml and 0.5µg/ml FLC, resistance emerged in 35 and 30  
380 adaptors, respectively, while tolerance was detected in 1 and 6 adaptors, respectively.  
381 The remaining adaptors appear to have had more transient tolerance that had been lost  
382 during growth in the absence of FLC. Adaptors evolved for 10 and 15 days in 0.5 µg/ml  
383 FLC also exhibited stepwise increases in resistance. YJB-T490 adaptors also acquired  
384 either resistance or tolerance (but not both). Among adaptors evolved in 0.25 µg/ml FLC,  
385 tolerance appeared after ten passages; yet after 15 passages in 0.25 µg/ml FLC for 15  
386 days, ten were tolerant, and 23 were resistant. At 0.5 µg/ml, the proportion of resistant  
387 YJB-T490 adaptors relative to tolerant adaptors increased over time (0 vs 58; 29 vs 18,  
388 and 72 vs 24, for adaptors from passages 5, 10 and 15, respectively (Fig. 6). While this  
389 is consistent with the idea that isolates may have acquired tolerance in early passages  
390 and then become resistant in the later passages, we cannot be sure that the resistant  
391 adaptors are progeny of the prior tolerant ones.

392  
393 The dynamics of the emergence of tolerance and resistance also differed considerably.  
394 In both parental strain backgrounds tolerance emerged more rapidly, within a single  
395 passage, while the first resistant adaptors appeared after 5 passages and only in  
396 SC5314 at 1 µg/ml FLC, while adaptors passaged in 0.25 µg/ml and 0.5 µg/ml only  
397 produced resistant and tolerant progeny after 10 days, and resistant adaptors after 15  
398 days. In YJB-T490, *tolerant* adaptors evolved at or below the MIC 1 µg/ml, 0.5 µg/ml  
399 and 0.25 µg/ml initially appeared in passages 1, 5, and 10, respectively, while *resistant*  
400 adaptors that emerged from 0.5 µg/ml and 0.25 µg/ml FLC initially appeared on days 10  
401 and 15, respectively. Thus, the acquisition of resistance and tolerance occurred at  
402 different relative stress levels (sub-MIC vs supra-MIC) and with different temporal  
403 dynamics (Fig. 6), and tolerant isolates generally appeared more rapidly than resistant  
404 isolates.

405

#### 406 **Distinct and diverse genetic alterations in fluconazole-resistant versus** 407 **fluconazole-tolerant adaptors**

408

409 Individual colonies that arose following the evolution of SC5314 in broth passages had a  
410 range of resistance or tolerance levels, suggesting that they may have acquired distinct  
411 genetic or genomic changes. To test this hypothesis, we sequenced 73 randomly  
412 selected adaptors (34 resistant and 39 tolerant) derived from SC5314. Large-scale  
413 genome changes were visualized with Ymap (Fig. 7 and Fig. S6), and variant calling  
414 was performed to identify mutations in predicted open reading frames, focusing on  
415 missense mutations and frameshift mutations.

416

417 Notably, all 39 tolerant adaptors that were sequenced were aneuploid (Fig. 7, lower  
418 section): 13 had whole or segmental aneuploidy only for all or segments of ChrR:  
419 (ChrRx3 (n=9), SegChrRx3 from 1.89Mb to right telomere (n=3), or SegChrRx1 from  
420 1.89Mb to right telomere (n=1)). An additional 25 adaptors were aneuploid for ChrR in  
421 combination with aneuploidy of another one or two chromosomes (n=22 and n=3,  
422 respectively). Only one tolerant adaptor (Chr6x3, ABB, evolved over 10 passages in 1

423  $\mu\text{g/ml}$  FLC) did not include copy number changes on ChrR. Thus, ChrR aneuploidy was  
424 the most prevalent aneuploidy associated with tolerance.

425  
426 Among the 34 resistant adaptors sequenced, the majority (22/34) were euploid and 12  
427 were aneuploid. Among the aneuploid adaptors, two (SY60 and SY61) had Chr3x3, five  
428 (SY20, SY21, SY22, SY51, SY55) had Chr5x3, four (SY50, SY56, SY58, SY59) had  
429 Chr7x3 (AAB), and one adaptor (SY57) had Chr6x3 (AAB) together with Chr7x3 (AAB).  
430 Notably, none of the resistant adaptors affected ChrR copy number and the karyotypes  
431 of the resistant adaptors were distinct from the tolerant adaptors (Fig. 7 and Fig.S5).  
432 Therefore, tolerant and resistant adaptors acquired distinct genomic changes: all  
433 tolerant adaptors were aneuploid, with ChrR aneuploidy as the predominant change  
434 while resistant adaptors were mostly euploid or were trisomic for either Chr3, Chr5, or  
435 Chr7.

436  
437 Importantly, similar types of karyotypes were detected in SC5314 and YJB-T490  
438 derived tolerant adaptors selected on supra-MIC FLC concentrations on agar plates (Fig.  
439 S3 and Fig. S4). Furthermore, the karyotypes of tolerant adaptors appeared in a dose-  
440 independent and time-independent manner (Table 1 and Fig. 7). For example, ChrRx3  
441 aneuploidies appeared after one day in 2  $\mu\text{g/ml}$  or 128  $\mu\text{g/ml}$  FLC, after 5 days in 1  
442  $\mu\text{g/ml}$  FLC, after 10 days in 0.25  $\mu\text{g/ml}$  FLC, and after 15 days in 2  $\mu\text{g/ml}$  FLC. Similarly,  
443 ChrRx3+Chr4x3 appeared after 1 day in 2  $\mu\text{g/ml}$  FLC, 10 days in 1  $\mu\text{g/ml}$ , 2  $\mu\text{g/ml}$  and  
444 128  $\mu\text{g/ml}$  FLC, and after 15 days in 2  $\mu\text{g/ml}$  and 128  $\mu\text{g/ml}$  FLC. And segChrRx3 (from  
445 the left telomere to 1.89 MB) appeared after 10 days in 0.5  $\mu\text{g/ml}$  FLC, and 15 days in 2  
446  $\mu\text{g/ml}$  and 128  $\mu\text{g/ml}$  FLC (Table 1). Thus, the same aneuploidies can arise at different  
447 concentrations and at different times after initial drug exposure.

448  
449 To ask about point mutations that may influence the degree of tolerance or resistance,  
450 we identified SNPs in the 39 tolerant and 34 resistant adaptors (Table S2). In total we  
451 found from 2 to 5 SNPs per tolerant isolate and 0 to 2 SNPs per resistant isolate. One of  
452 the two ORFs with detectable SNPs in both a tolerant and a resistant adaptor was  
453 C2\_08380C, a possible ortholog of *S. cerevisiae* *DPB11*, that, when mutated, causes



454 gross chromosomal rearrangements, chromosome loss and an increase in spontaneous  
455 DNA damage (Araki, et al. 1995). While the degree to which these specific SNPs affect  
456 the encoded function is not known, this gene might contribute to increased frequencies  
457 of mutations in the adaptors.

458  
459 SNPs found only in *tolerant* adaptors were detected in 27 ORFs. However, of these 27  
460 only one could be associated with drug tolerance: C1\_04010C. We detected 2 SNPs in  
461 this ORF in 4 different adaptors. This gene encodes a protein with a predicted NADP-  
462 dependent oxidoreductase domain, and its transcript is induced by ketoconazole, yet is  
463 repressed by Upc2p, a transcription factor that up-regulates ergosterol biosynthesis  
464 (Synnott, et al. 2010). There was no statistically significant (FDR > 0.1) gene ontology  
465 term enrichment of these 27 genes. Thus, the few SNPs that appeared may be neutral  
466 mutations and do not appear to have any obvious connections to drug resistance or  
467 tolerance.

468  
469 SNPs found only in *resistant* adaptors were detected in 7 genes with no detectable  
470 gene ontology term enrichment (FDR > 0.1), but none were in genes that encode efflux  
471 pumps, or that are known to affect ergosterol biosynthesis, the two major mechanisms  
472 of azole resistance. We suggest that some of these SNPs are probably neutral or  
473 nearly-neutral mutations that arose during the course of passaging and/or false positive  
474 variants that our quality filters were not stringent enough to filter out.

475  
476  
477

## 478 Discussion

479

480 Contrary to the concept from bacteria that antimicrobial drugs primarily select for the  
481 rapid evolution of drug resistance, here we found that *C. albicans*, a common cause of  
482 systemic bloodstream infections, primarily acquired tolerance to the widely used drug  
483 FLC. Importantly, this antifungal tolerance appeared rapidly, in some cases within a  
484 single day of exposure to drug concentrations above the strain MIC, while resistant  
485 isolates appeared after 5 days of exposure to low levels of FLC. Furthermore, the  
486 resistant isolates exhibited a stepwise increase in MIC levels (Fig. 6A), and we found no  
487 evidence that mutations in classic genes associated with FLC resistance played any  
488 role in the resistance acquired under the conditions used.

489

490 Here, we found that most clinical *C. albicans* isolates exhibit FLC tolerance at  
491 physiologically relevant temperatures, and not at 30°C, the temperature often used in  
492 lab studies (Fig. 1). This antifungal tolerance is largely dose-independent at supra-MIC  
493 drug concentrations (Fig. 2). Experimental evolution in supra-MIC drug concentrations  
494 rapidly selected for the acquisition of tolerance that was associated with a recurrent set  
495 of aneuploidies (Figs. 3,4,6,7). Resistant isolates only appeared at or below the MIC,  
496 after 5 or more days of passaging (Fig. 6). While most resistant isolates were not  
497 aneuploid, those that carried recurrent aneuploidies had extra copies of different  
498 chromosomes from those seen in tolerant isolates (Fig. 7). Furthermore, resistance (but  
499 not tolerance) appeared to be acquired in a stepwise manner (Fig. 6). Thus,  
500 experimental evolution at sub-MIC FLC concentrations selected for isolates that were  
501 either only tolerant or only resistant, and a different set of recurrent aneuploidies  
502 conferred tolerance vs resistance.

503

504 Of the original 133 clinical *C. albicans* isolates tested at 37°C and 39°C, up to 92.5% of  
505 the isolates were tolerant, while at 30°C only 23.3% of isolates were tolerant. Thus, it  
506 appears that FLC tolerance is prevalent in clinical isolates, at least those collected from  
507 Israeli patients. These clinical strains are largely euploid; thus, we suggest that  
508 tolerance is primarily due to genomic factors, including inherent genetic backgrounds,

509 that modulate stress responses in different physiological conditions, such as  
510 temperature and medium composition. In addition, the acquisition of aneuploidy can  
511 increase or modulate tolerance levels. While this study focused on 133 Israeli clinical  
512 isolates, it will be interesting to determine if other clinical isolates exhibit temperature-  
513 enhanced tolerance.

514  
515 Tolerant isolates were able to grow at supra-MIC fluconazole concentrations up to 128  
516  $\mu\text{g/ml}$ . Furthermore, the time of colony appearance, as well as growth rate of colonies  
517 on drug plates were dose-independent at supra-MIC FLC concentrations. Yet, below the  
518 MIC, colony growth rates were dose-dependent with colonies growing more slowly with  
519 increasing drug concentrations. This suggests that *C. albicans* mounts distinct cellular  
520 responses at sub-MIC versus supra-MIC drug concentrations. The concentration-  
521 independent nature of tolerant cell growth rates and the initial time of colony  
522 appearance at supra-MIC, and the concentration-dependent nature of resistance (Fig.  
523 2B and C) at sub-MIC concentrations, highlights probably mechanistic differences  
524 between these processes. We posit that tolerance involves cellular stress mechanisms  
525 that are less sensitive to the intracellular drug concentration and enable growth when  
526 the drug target, in this case lanosterol demethylase, is completely inactivated by drug.  
527 The fact that different aneuploidies or mutations accompany tolerance vs resistance  
528 further supports this idea. Furthermore, isolates with different genetic backgrounds at  
529 the temperatures used and on agar or in broth media, adapted to supra-MIC FLC  
530 primarily by acquiring the same aneuploidies involving ChrR.

531  
532 All tolerant adaptors had at least one aneuploid chromosome. In addition to the  
533 recurrent karyotypes involving ChrR aneuploidies, some tolerant adaptors acquired  
534 other aneuploidies. This suggests that individual cells use a similar strategy,  
535 chromosome instability, to reach non-identical outcomes (e.g., different levels of  
536 acquired tolerance) from different combinations of aneuploid chromosomes that provide  
537 a growth advantage in supra-MIC drug concentrations. Even though we detected a few  
538 SNPs in the aneuploid isolates and we do not know the degree to which they may (or  
539 may not) contribute to tolerance, the fact that loss of the aneuploid chromosome(s) was

540 accompanied by loss of FLC tolerance suggests that aneuploidy was the primary  
541 mechanism conferring tolerance.

542  
543 Strain background and environmental conditions also contribute to the selective  
544 conditions that favor the acquisition of different aneuploidies. Interestingly, in both the  
545 TET and NT backgrounds, amplification of portions of ChrR enabled tolerance at 30°C  
546 but not at 37°C. Yet, for the NT strain, Chr6 trisomy increased tolerance at both 30°C  
547 and 37°C in the presence of the same range of FLC concentrations. Thus, the rapid  
548 emergence of tolerance can occur via multiple routes, and the trajectories of the routes  
549 are affected by the original strain background and the selection conditions. Future work  
550 will require analyzing the trajectories of adaptation of additional TET and NT isolates  
551 and identifying the chromosomal region(s) that specifically affect tolerance at different  
552 temperatures.

553  
554 Some of the tolerant adaptors also became less FLC resistant (more susceptible, larger  
555 RAD<sub>20</sub>). This was also seen for isolates passaged in posaconazole, another fungistatic  
556 azole (Kukurudz, et al. 2022). This supports the idea that the acquisition of antifungal  
557 resistance and antifungal tolerance follow different trajectories and that supra-MIC  
558 concentrations preferentially and can rapidly select for azole tolerance along with  
559 decreased azole resistance.

560  
561 All tolerant strains acquired aneuploidy together and had a similar range of tolerance  
562 levels at all supra-MIC concentrations. By contrast, the resistant mutations that  
563 appeared at concentrations at or below the MIC, continued to become more resistant  
564 over time (Fig. 6 and Fig. S5). Interestingly, this stepwise acquisition of improved fitness  
565 was seen both with aneuploid and euploid resistant adaptors. This highlights the very  
566 different evolutionary trajectories that occur above and below the MIC. At all the supra-  
567 MIC concentrations tested, when the drug target is completely inhibited/saturated by  
568 drug, cells must respond with strategies independent of the drug-target interaction. By  
569 contrast, at sub-MIC concentrations, the drug target is not saturated, all cells are able to  
570 grow to some degree, providing the opportunity for the acquisition of a series of

571 mutations that incrementally increased resistance. At sub-MIC, tolerance also emerged  
572 occasionally.

573  
574 Why does aneuploidy appear so rapidly and with such a high frequency ( $\sim 10^{-3}$ ) following  
575 exposure to supra-MIC drug concentrations? We suggest that three forces drive the  
576 rapid appearance of aneuploidy at high frequency: first, random aneuploid  
577 chromosomes maintained in the parent population may provide standing variation;  
578 second, fluconazole induces chromosome mis-segregation via cell cycle defects that  
579 yield tetraploid intermediates and, subsequently, random aneuploids (Harrison, et al.  
580 2014; Altamirano, et al. 2017) at high frequency; and third, strong selection for specific  
581 aneuploidies that provide an adaptive advantage in the presence of the drug allows the  
582 aneuploid isolates to compete and outgrow arrested euploid cells (Yang, Todd, et al.  
583 2021). Chromosome mis-segregation events that lead to whole chromosome  
584 aneuploidy are relatively frequent (every  $5 \times 10^5$  cell divisions in yeast (Hartwell, et al.  
585 1982) and on the order of once every  $10^4$  to  $10^5$  divisions in mammalian cells  
586 (Rosenstraus and Chasin 1978)). Since *C. albicans* chromosomes contain between  
587 407-1383 genes per chromosome  
588 ([http://www.candidagenome.org/cache/C\\_albicans\\_SC5314\\_genomeSnapshot.html](http://www.candidagenome.org/cache/C_albicans_SC5314_genomeSnapshot.html), as  
589 of Nov 24, 2022), it follows that a single aneuploid chromosome should affect the  
590 stoichiometry of many proteins. Even if these aneuploidies have a fitness cost under  
591 standard growth conditions, if they provide a fitness advantage in drug, they should be  
592 maintained at least until classic point mutations, with better fitness are selected and  
593 ultimately out-compete the aneuploids (Yona, et al. 2012). Segmental aneuploidies,  
594 which are dependent upon recombination events, also appeared. It is tempting to  
595 speculate that either drug stress increases the likelihood of mitotic recombination as  
596 was seen for LOH events (Forche, et al. 2011), or that recombination events are more  
597 frequent in strains carrying aneuploid chromosomes. Consistent with this idea, haploid  
598 *S. cerevisiae* lab strains carrying single extra chromosomes conferred increased mitotic  
599 recombination as well as chromosome instability (Sheltzer, et al. 2011).

600

601 In this study, tolerant adaptors emerged more rapidly (within one passage) than  
602 resistant adaptors. Ultimately, all supra-MIC isolates became tolerant, while only some  
603 of the sub-MIC adaptors became resistant. Indeed, even resistant adaptors that had  
604 acquired resistance via aneuploidy appeared much later in the passaging and appear to  
605 have arisen from tolerant intermediates (e.g., some adaptors evolved in 0.5 µg/ml and 1  
606 µg/ml FLC were tolerant on day 10, but all were resistant on day 15, and some were  
607 aneuploid (Fig. 6)). Thus, while the dynamics of acquiring tolerance is different at sub-  
608 and supra-MIC drug concentrations, a similar set of aneuploidies confers resistance,  
609 and a different set of aneuploidies can confer tolerance.

610  
611 In *C. albicans*, two major mechanisms contribute to FLC resistance: alteration of the  
612 drug target and increased drug efflux. A combination of these mechanisms causes  
613 stepwise development of FLC resistance ((Sasse, et al. 2012); reviewed in  
614 (Morschhauser 2002)) or can arise in a single segmental aneuploidy (Selmecki, et al.  
615 2008). Surprisingly, we did not find any of the classic resistance mutations in resistant  
616 adaptors. This could be due to the high fitness cost of mutations in these genes (Sasse,  
617 et al. 2012; Hill, et al. 2015; Popp, et al. 2017). In the presence of sub-MIC FLC, cells  
618 are under weak stress and mutations with a high fitness cost might be outcompeted. In  
619 general, gain-of-function mutations in *MRR1*, *TAC*, or *UPC2* in FLC-resistant clinical  
620 isolates incur a fitness cost and are outcompeted by the matched susceptible isolates  
621 both *in vitro* and *in vivo* (Popp, et al. 2017). Artificially introducing resistance-enhancing  
622 mutations causes a stepwise increase in resistance that is associated with a gradual  
623 reduction in fitness both *in vivo* and *in vitro* (Sasse, et al. 2012). Similarly, experimental  
624 evolution with increasing amounts of FLC yielded resistant mutants with mutations in  
625 *TAC1*, *UPC2*, and/or *ERG11* that were less fit than their parents in macrophages, as  
626 well as in the presence of several stresses, including cell wall stress, cell membrane  
627 stress, salt stress, oxidative stress and temperature stress (Hill, et al. 2015). The longer  
628 time required for resistant adaptors to arise, even if aneuploid, provides indirect support  
629 for the idea that resistance is due to the accumulation of multiple mutational events.  
630

631 Cells appear to adopt different adaptive trajectories at supra-MIC versus sub-MIC drug  
632 concentrations. At supra-MIC FLC, extreme stress may favor the immediate  
633 appearance of tolerance, perhaps because aneuploidy can appear within a single cell  
634 division or because aneuploidy may slow growth and thus might slow drug metabolism.  
635 At sub-MIC FLC concentrations, cells experience only mild stress that does not affect  
636 cell survival, which may enable the evolution of resistance in a stepwise manner. The  
637 degree of resistance, measured by the MIC or RAD, can increase over time of exposure  
638 to the drug (Fig. 6 and Fig. S5). Accordingly, more extended passaging at sub-MIC FLC  
639 concentrations yields adaptors with higher MIC levels. We speculate that this may  
640 involve a sequential acquisition of several different types of resistance mutations,  
641 including point mutations that confer stable drug resistance.

642  
643 In bacteria, both sub- and supra-MIC antibiotic concentrations select for resistant  
644 mutants, but different selection strengths confer different evolutionary trajectories and  
645 drive the acquisition of different mutations. When selected in cidal antibiotics at supra-  
646 MIC drug concentrations, resistance mutations in one or a small number of “classical”  
647 resistance genes are selected. But when exposed to low antibiotic concentrations,  
648 bacteria accumulate mutations of several “non-classic” genes that individually confer  
649 weak resistance but together can confer higher resistance levels (Wistrand-Yuen, et al.  
650 2018). In addition, selection at sub-MIC antibiotic concentrations can select for plasmids  
651 carrying multiple resistance genes that lead to multidrug resistance (MDR) (Gullberg, et  
652 al. 2014).

653  
654 In summary, FLC tolerance is prevalent in *C. albicans* clinical isolates, especially at  
655 37°C and it exhibits different temperature responses in different strain backgrounds.  
656 The acquisition of resistance and tolerance occurs via distinct evolutionary trajectories  
657 that are largely a function FLC stress levels: supra-MIC FLC stress drives tolerance,  
658 which appears rapidly and enables growth at wide range of supra-MIC drug  
659 concentrations; sub-MIC FLC stress selects for either tolerance or stepwise elevated  
660 resistance. Different strains have different intrinsic levels of tolerance, but they generally  
661 appear to rapidly acquire additional tolerance by becoming trisomic for specific

662 chromosomes. The most commonly acquired aneuploidy in tolerant adaptors is part or  
663 all of ChrR, while trisomy of Chr3 or Chr5, are associated with the relatively rapid  
664 appearance of increased antifungal drug resistance.

665

## 666 **Materials and Methods**

667

### 668 **Strains and growth conditions**

669 Strains use in this study are listed in Table S3. Stock cultures of all strains were  
670 preserved in 35% glycerol and maintained at -80°C. The 133 clinical *C. albicans* were  
671 collected from hospitals in Israel and kindly provided by Ronen Ben-Ami. Unless  
672 otherwise specified, cells were routinely grown on Yeast extract-Peptone-Dextrose  
673 (YPD)-agar media (1% [w/v] yeast extract, 2% [w/v] peptone and 2% [w/v] D-glucose,  
674 2%[w/v] agar) at 30°C. Other media used in this study include casitone agar plates  
675 (0.9%[wt/vol] casitone, 0.5% [wt/vol] yeast extract, 1.15% sodium citrate dihydrate  
676 [wt/vol], 2% [wt/vol] glucose, 2% [wt/vol] d-glucose, and 2% [wt/vol] agar), SD agar  
677 plates (0.67% [wt/vol] yeast nitrogen base without amino acids, 2% [wt/vol] d-glucose,  
678 and 2% [wt/vol] agar), and SDC agar plates (0.67% [wt/vol] yeast nitrogen base without  
679 amino acids, 2% [wt/vol] d-glucose, 0.2% [wt/vol] complete amino acid mixture, and 2%  
680 [wt/vol] agar). Drugs were dissolved in dimethyl sulfoxide (DMSO) and stored at -20°C.

681

### 682 **E-test strip assays**

683

684 E-tests were performed as described previously (Yang, Gritsenko, Lu, et al. 2021).  
685 Strains were streaked from -80°C freezer onto YPD agar. After incubation at designated  
686 temperature (30, 37 or 39°C) for 24h, colonies were chosen randomly and suspended in  
687 distilled water. Cell density was determined using a hemocytometer. Cells were  
688 adjusted to  $1 \times 10^6$  cells/ml, and 100  $\mu$ l of the culture was spread on YPD agar. The plate  
689 with an FLC E-test strip (BioMerieux, Marcy l'Etoile, France) at the center was incubated  
690 at designated temperature for 24h and then photographed.

691

### 692 **Disk diffusion assays**



693  
694 Disk diffusion assays were performed as previously described (Rosenberg, et al. 2018;  
695 Xu, et al. 2021). The CLSI M44-A2 guidelines for antifungal disk diffusion susceptibility  
696 testing were followed with slight modifications. Briefly, strains were streaked from  
697 glycerol stocks onto YPD agar and incubated for 36h at designated temperatures.  
698 Colonies were suspended in distilled water and adjusted to  $1 \times 10^6$  cells/ml. 100  $\mu$ l of cell  
699 suspension were spread onto 15 ml YPD plates. An empty paper disk (6 mm diameter,  
700 and 0.7 mm thickness) supplemented with 5  $\mu$ l of 5 mg/ml FLC was placed in the center  
701 of each plate. Plates were then incubated at designated temperature and photographed  
702 at 24h and 48h. Analysis of the disk diffusion assay was done using the *diskImageR*  
703 pipeline (Gerstein, et al. 2016). The fraction of growth inside the zone of inhibition and  
704 radius of inhibition, referred to as FoG and RAD throughout the manuscript, represent  
705 parameters measured at 20% drug inhibition (FoG<sub>20</sub> and RAD<sub>20</sub>, respectively).

706

#### 707 **Spot assay**

708

709 Cells were suspended in distilled water and counted using a hemocytometer. Cell  
710 density was adjusted to  $1 \times 10^7$  cells/ml. 3  $\mu$ l of 10-fold serial dilutions were spotted on  
711 YPD plates with or without drugs (control). The plates were incubated at the designated  
712 temperature and photographed after 2 days.

713

#### 714 **ScanLag assay**

715

716 The *ScanLag* assay was performed as described in (Rosenberg, et al. 2018) with minor  
717 modifications. Approximately 100 cells were spread onto YPD plates with or without  
718 FLC. The plates were placed on the scanners at designated temperature and scanned  
719 every 30 min for 48 h. Image analysis was done in MATLAB using the modified  
720 “ScanLag” script (Levin-Reisman, et al. 2014; Rosenberg, et al. 2018).

721

#### 722 **Obtaining drug adaptors from plates**

723

724 Cells were adjusted to  $1 \times 10^7$  cells/ml as described above. 100  $\mu$ l of the culture were  
725 spread on YPD plates supplemented with drugs. The plates were incubated at the  
726 designated temperature for 5 days. Adaptors were randomly chosen.

727

### 728 **Daily passage in YPD broth supplemented with fluconazole**

729

730 SC5314 was inoculated into 1ml YPD broth at a final density of approximately  $2.5 \times 10^3$   
731 cells/ml. The YPD broth was supplemented with DMSO (negative control) or with 2-fold  
732 increase of FLC from 0.25  $\mu$ g/ml – 128  $\mu$ g/ml FLC. Every 24h or when the OD600 of  
733 culture was higher than 1.0, 1  $\mu$ l of each culture was inoculated into 1ml YPD broth  
734 supplemented with the same concentration of FLC. After 1, 5, 10, and 15 days, the 200  
735  $\mu$ l cultures were washed and diluted with distilled water. Approximately 100 cells were  
736 spread on YPD plates. The plates were incubated at 30°C for 36 h and 18 colonies from  
737 each plate were randomly tested with DDAs using FLC-containing disks.

738

### 739 **Colony instability assay**

740

741 As described previously (Yang, Todd, et al. 2021), aneuploid strains were streaked from  
742 -80°C freezer to YPD plates and incubated at 30°C for 36 h. One small colony was  
743 randomly chosen and suspended in distilled water. Cells were diluted with distilled water  
744 and approximately 200 cells were spread on a YPD plate and incubated at 30°C for 36 h.  
745 One small (S) colony and one large (L) colony were randomly chosen for further studies.

746

### 747 **Next generation sequencing (NGS)**

748

749 NGS was performed as described in (Yang, Todd, et al. 2021).

750

### 751 **Variant calling**

752 Paired-end short reads of all sequences obtained from NGS were trimmed with  
753 Trimmomatic (version 0.39; (Bolger, et al. 2014)) with default settings and read quality.  
754 Trimmed reads were aligned to both alleles of the *C. albicans* reference genome

755 (GCF\_000182965.3\_ASM18296v3) with Burrows-Wheeler Aligner (bwa mem, version  
756 0.7.17; (Li and Durbin 2009)). The alignments were sorted with SAMtools (samtools  
757 view; samtools sort; version 1.15.1; (Li, et al. 2009)), and duplicates were marked and  
758 removed with Picard Tools (version 2.27.5; available at  
759 <http://broadinstitute.github.io/picard/>). Indels were then realigned with GATK (version  
760 3.8-1-0; (Auwera and O'Connor 2020)), and the alignments were resorted and  
761 reindexed with SAMtools. Variants (SNPs and indels) were called using FreeBayes (-J -  
762 K --report-genotype-likelihood-max -a -F 0.1; version 0.9.21; (Garrison and Marth 2012)).  
763 Variants that were present in both ancestor and evolved strains were removed using  
764 BCFtools (isec; version 1.16-17; (Li, et al. 2009)), filtered for quality with BCFtools, and  
765 annotated with SNPEff (version 5.1d; (Cingolani, et al. 2012)). The validity of each high-  
766 quality variant was then checked using the Integrative Genomics Viewer (IGV; version  
767 2.15.1; (Robinson, et al. 2011))

768

## 769 **GO analysis**

770 Gene Ontology Term Finder tool on Candida Genome Database  
771 (<http://www.candidagenome.org/cgi-bin/GO/goTermFinder>) was used for functional  
772 enrichment analysis, using default parameters. Only hits with p-value corrected for false  
773 positives FDR < 0.1 were considered as significant.

774

## 775 **Data availability**

776

777 All sequence data are available in the ArrayExpress database at EMBL-EBI  
778 ([www.ebi.ac.uk/arrayexpress](http://www.ebi.ac.uk/arrayexpress)) under accession numbers E-MTAB-12175, E-MTAB-  
779 12155, E-MTAB-12169 and E-MTAB-12189.

780

## 781 **Acknowledgements**

782 We thank Jacob Steenwyk for helpful suggestions. This work was supported by the  
783 National Key Research and Development Program of China (2021YFC2300400), the  
784 National Natural Science Foundation of China (NO. 82020108032), and the Innovation  
785 Program of Shanghai Municipal Education Commission (NO. 202101070007E00094) to

786 Yuan-ying Jiang. National Natural Science Foundation of China (NO. 81872910), and  
787 Shanghai Key Basic Research Project (NO. 19JC1414900) to Yong-bing Cao. Judith  
788 Berman also received funding from the European Research Council (ERC) under the  
789 European Union's Horizon 2020 research and innovation programme (grant agreement  
790 No 951475).

791

## 792 **Figure legends**

793

### 794 **Figure 1. Measuring tolerance levels at 30°C, 37°C, and 39°C identify three classes** 795 **temperature response.**

796 Disk diffusion assays were performed on 133 different clinical isolates at the indicated  
797 temperatures (30°C, 37°C, and 39°C). The isolates were classified as temperature-  
798 enhanced tolerant (TET), all-temperature tolerant (ATT), and non-tolerant (NT), based  
799 on FoG<sub>20</sub> values at the three temperatures. \*\* indicates p-value<0.001 as determined by  
800 two-tailed paired t-test (**A**). **B** is the distribution of tolerant isolates at different  
801 temperatures (n=133). At 30 °C, 69.2% were TET, 23.3% ATT, 7.5% NT. Thus, the vast  
802 majority of strains exhibit tolerance at least at some temperatures.

803

### 804 **Figure 2. Temperature dependent growth dynamics of representative TET, ATT** 805 **and NT strains in different drug concentrations.**

806 Representative isolates (TET, SC5314; ATT, YJB-T1891; and NT, YJB-T490) were  
807 assayed on plates with FLC E-Test strips (A) and on 10-fold dilution spot assays (B) at  
808 30°C, 37°C and 39°C on YPD medium at the FLC concentrations indicated. In both  
809 cases, plates were photographed after 48h at the indicated temperatures. Growth  
810 dynamics of isolates in the presence of FLC were measured using *ScanLag* (Levin-  
811 Reisman, et al. 2014; Rosenberg, et al. 2018). Approximately 100 colonies of the test  
812 strains were plated onto YPD plates supplemented with FLC at the concentrations  
813 indicated (C). The growth of colonies was monitored at 30°C and 37°C using *ScanLag*.  
814 Colony area was calculated from the area of light pixels in the images, a proxy for  
815 colony size, and the change in colony size over time was used to estimate colony  
816 growth rate. Note in (B) and (C), for tolerant isolates, growth was similar at all

817 fluconazole concentrations equivalent to and above MIC. The graphs show the  
818 distribution of Time of colony Appearance (TOA, top panel) and growth rate (bottom  
819 panel) for all colonies on each plate, in 72 hours (top panel). The area of colonies  
820 occupied by light pixels and the change in this area over time are proxies for colony size  
821 and growth rate.

822

### 823 **Figure 3. Selection for adaptors at supra-MIC fluconazole concentrations.**

824 FLC adaptors derived from TET strain SC5314 at 30°C, and those derived from the NT  
825 strain YJB-T490 at 30°C and 37°C, were tested for resistance ( $RAD_{20}$ ) and tolerance  
826 ( $Fog_{20}$ ) on disk diffusion assays at 30°C and 37°C. The disks contained 25 µg FLC. The  
827 plates were photographed at 24h and 48h for measuring  $RAD_{20}$  and  $Fog_{20}$ , respectively.  
828 Each plot represents the data from 18 colonies that adapted to fluconazole  
829 concentrations indicated in YPD plates. In the parents, 16 individual colonies were  
830 tested.

831

### 832 **Figure 4. Recurrent aneuploidies associated with resistant and tolerant** 833 **fluconazole adaptors**

834 (A) Karyotypes recurrently identified in TET and NT derived fluconazole adaptors  
835 selected at 30°C. The total number of aneuploid adaptors, and the number of adaptors  
836 bearing each karyotype are also indicated. Chromosomes 1,2,3,5, which were euploid  
837 in these karyotypes, are not shown. (B) Karyotypes of 9 adaptors derived from NT  
838 isolate at 37°C. None of the karyotypes was identified in (A). The grey colored  
839 karyotypes include adaptors with aneuploidy of different homologs of the same  
840 chromosomes. The detailed karyotypes are shown in Fig. S3 and Fig. S4.

841

### 842 **Figure 5. Tolerance acquisition and loss is associated with the gain and loss of** 843 **aneuploid chromosomes**

844 Strains with different aneuploid chromosomes were spread onto YPD plates and grown  
845 for 36 h at 30°C. Small colonies (S) and large colonies (L), indicated by yellow arrows  
846 and cyan arrows, respectively (A) were tested by standard disc diffusion assays (25 µg

847 FLC per disk). The plates were incubated at 30°C for 48 h (B). Both S and L colonies  
848 were sequenced. The karyotypes were visualized by using Ymap (C).

849

850 **Figure 6. Distinct evolutionary trajectories associated with supra- and sub-MIC**  
851 **fluconazole concentrations.**

852 Emergence of tolerance (increased FoG<sub>20</sub>) and resistance (decreased RAD<sub>20</sub>)  
853 measured on disk diffusion assays for 18 isolates from each indicated passage of TET  
854 isolate SC5314 (A) and NT isolate YJB-T490 (B) for 1-15 days of propagation at the  
855 indicated drug concentrations. The MIC (1 µg/ml) is highlighted in grey. Note that a  
856 broad range of tolerance emerges at all supra-MIC concentrations starting at passage 1,  
857 while increasing levels of resistance appear with time at or below the MIC only.

858

859 **Figure 7. Distinct genomic changes in resistant and tolerant adaptors.**

860 DNA sequences of 34 FLC-resistant and 39 FLC-tolerant adaptors evolved from TET  
861 strain SC5314 were analyzed by Ymap (Abbey, et al. 2014). The karyotypes, number of  
862 adaptors with this karyotype, and the drug conditions (number of days evolved and FLC  
863 concentration) are indicated to the right of each karyotype diagram. For example, D5-1  
864 indicates that the adaptors were evolved for 5 days in 1 µg/ml FLC. Colors indicate  
865 allele frequencies in the data as indicated in the key. Black histograms indicate the log<sub>10</sub>  
866 ratio of DNA copy number for the strain indicated relative to a diploid control

867

868 **Table 1.** Karyotypes of the 34 resistant and 39 tolerant evolved progeny analyzed.

869

## 870 **References**

- 871 Abbey DA, Funt J, Lurie-Weinberger MN, Thompson DA, Regev A, Myers CL, Berman J. 2014.  
872 YMAP: a pipeline for visualization of copy number variation and loss of heterozygosity in  
873 eukaryotic pathogens. *Genome Med* 6:100.
- 874 Altamirano S, Fang D, Simmons C, Sridhar S, Wu P, Sanyal K, Kozubowski L. 2017. Fluconazole-  
875 Induced Ploidy Change in *Cryptococcus neoformans* Results from the Uncoupling of Cell Growth  
876 and Nuclear Division. *mSphere* 2.
- 877 Araki H, Leem SH, Phongdara A, Sugino A. 1995. Dpb11, which interacts with DNA polymerase  
878 II(epsilon) in *Saccharomyces cerevisiae*, has a dual role in S-phase progression and at a cell cycle  
879 checkpoint. *Proc Natl Acad Sci U S A* 92:11791-11795.
- 880 Auwera GVd, O'Connor B. 2020. Genomics in the Cloud: Using Docker, GATK, and WDL in Terra.  
881 In: O'Reilly Media.
- 882 Berman J, Krysan DJ. 2020. Drug resistance and tolerance in fungi. *Nat Rev Microbiol* 18:319-  
883 331.
- 884 Bolger AM, Lohse M, Usadel B. 2014. Trimmomatic: a flexible trimmer for Illumina sequence  
885 data. *Bioinformatics* 30:2114-2120.
- 886 Bongomin F, Gago S, Oladele RO, Denning DW. 2017. Global and Multi-National Prevalence of  
887 Fungal Diseases-Estimate Precision. *J Fungi (Basel)* 3.
- 888 Carolus H, Pierson S, Lagrou K, Van Dijck P. 2020. Amphotericin B and Other Polyenes-Discovery,  
889 Clinical Use, Mode of Action and Drug Resistance. *J Fungi (Basel)* 6.
- 890 Cingolani P, Platts A, Wang le L, Coon M, Nguyen T, Wang L, Land SJ, Lu X, Ruden DM. 2012. A  
891 program for annotating and predicting the effects of single nucleotide polymorphisms, SnpEff:  
892 SNPs in the genome of *Drosophila melanogaster* strain w1118; iso-2; iso-3. *Fly (Austin)* 6:80-92.
- 893 Enoch DA, Yang H, Aliyu SH, Micallef C. 2017. The Changing Epidemiology of Invasive Fungal  
894 Infections. *Methods Mol Biol* 1508:17-65.
- 895 Fisher MC, Alastruey-Izquierdo A, Berman J, Bicanic T, Bignell EM, Bowyer P, Bromley M,  
896 Bruggemann R, Garber G, Cornely OA, et al. 2022. Tackling the emerging threat of antifungal  
897 resistance to human health. *Nat Rev Microbiol* 20:557-571.
- 898 Forche A, Abbey D, Pisithkul T, Weinzierl MA, Ringstrom T, Bruck D, Petersen K, Berman J. 2011.  
899 Stress alters rates and types of loss of heterozygosity in *Candida albicans*. *mBio* 2.
- 900 Garrison EP, Marth GT. 2012. Haplotype-based variant detection from short-read sequencing.  
901 arXiv: Genomics.
- 902 Gerstein AC, Rosenberg A, Hecht I, Berman J. 2016. diskImageR: quantification of resistance and  
903 tolerance to antimicrobial drugs using disk diffusion assays. *Microbiology (Reading)* 162:1059-  
904 1068.
- 905 Gullberg E, Albrecht LM, Karlsson C, Sandegren L, Andersson DI. 2014. Selection of a multidrug  
906 resistance plasmid by sublethal levels of antibiotics and heavy metals. *mBio* 5:e01918-01914.
- 907 Harrison BD, Hashemi J, Bibi M, Pulver R, Bavli D, Nahmias Y, Wellington M, Sapiro G, Berman J.  
908 2014. A tetraploid intermediate precedes aneuploid formation in yeasts exposed to fluconazole.  
909 *PLoS Biol* 12:e1001815.
- 910 Hartwell LH, Dutcher SK, Wood JS, Garvik B. 1982. The fidelity of mitotic chromosome  
911 reproduction in *S. cerevisiae*. *Rec Adv Yeast Mol Biol* 1:28-38.

912 Hill JA, O'Meara TR, Cowen LE. 2015. Fitness Trade-Offs Associated with the Evolution of  
913 Resistance to Antifungal Drug Combinations. *Cell Rep* 10:809-819.

914 Janbon G, Sherman F, Rustchenko E. 1998. Monosomy of a specific chromosome determines L-  
915 sorbose utilization: a novel regulatory mechanism in *Candida albicans*. *Proc Natl Acad Sci U S A*  
916 95:5150-5155.

917 Kukurudz RJ, Chapel M, Wonitowy Q, Adamu Bukari AR, Sidney B, Sierhuis R, Gerstein AC. 2022.  
918 Acquisition of cross-azole tolerance and aneuploidy in *Candida albicans* strains evolved to  
919 posaconazole. *G3 (Bethesda)* 12.

920 Levin-Reisman I, Fridman O, Balaban NQ. 2014. ScanLag: high-throughput quantification of  
921 colony growth and lag time. *J Vis Exp*.

922 Levinson T, Dahan A, Novikov A, Paran Y, Berman J, Ben-Ami R. 2021. Impact of tolerance to  
923 fluconazole on treatment response in *Candida albicans* bloodstream infection. *Mycoses* 64:78-  
924 85.

925 Li H, Durbin R. 2009. Fast and accurate short read alignment with Burrows-Wheeler transform.  
926 *Bioinformatics* 25:1754-1760.

927 Li H, Handsaker B, Wysoker A, Fennell T, Ruan J, Homer N, Marth G, Abecasis G, Durbin R,  
928 Genome Project Data Processing S. 2009. The Sequence Alignment/Map format and SAMtools.  
929 *Bioinformatics* 25:2078-2079.

930 Morschhauser J. 2002. The genetic basis of fluconazole resistance development in *Candida*  
931 *albicans*. *Biochim Biophys Acta* 1587:240-248.

932 Pappas PG, Kauffman CA, Andes DR, Clancy CJ, Marr KA, Ostrosky-Zeichner L, Reboli AC,  
933 Schuster MG, Vazquez JA, Walsh TJ, et al. 2016. Clinical Practice Guideline for the Management  
934 of Candidiasis: 2016 Update by the Infectious Diseases Society of America. *Clin Infect Dis* 62:e1-  
935 50.

936 Pfaller MA, Diekema DJ, Turnidge JD, Castanheira M, Jones RN. 2019. Twenty Years of the  
937 SENTRY Antifungal Surveillance Program: Results for *Candida* Species From 1997-2016. *Open*  
938 *Forum Infect Dis* 6:S79-S94.

939 Popp C, Hampe IAI, Hertlein T, Ohlsen K, Rogers PD, Morschhauser J. 2017. Competitive Fitness  
940 of Fluconazole-Resistant Clinical *Candida albicans* Strains. *Antimicrob Agents Chemother* 61.

941 Robbins N, Caplan T, Cowen LE. 2017. Molecular Evolution of Antifungal Drug Resistance. *Annu*  
942 *Rev Microbiol* 71:753-775.

943 Robbins N, Wright GD, Cowen LE. 2016. Antifungal Drugs: The Current Armamentarium and  
944 Development of New Agents. *Microbiol Spectr* 4.

945 Robinson JT, Thorvaldsdottir H, Winckler W, Guttman M, Lander ES, Getz G, Mesirov JP. 2011.  
946 Integrative genomics viewer. *Nat Biotechnol* 29:24-26.

947 Roemer T, Krysan DJ. 2014. Antifungal drug development: challenges, unmet clinical needs, and  
948 new approaches. *Cold Spring Harb Perspect Med* 4.

949 Rosenberg A, Ene IV, Bibi M, Zakin S, Segal ES, Ziv N, Dahan AM, Colombo AL, Bennett RJ,  
950 Berman J. 2018. Antifungal tolerance is a subpopulation effect distinct from resistance and is  
951 associated with persistent candidemia. *Nat Commun* 9:2470.

952 Rosenstraus MJ, Chasin LA. 1978. Separation of linked markers in Chinese hamster cell hybrids:  
953 mitotic recombination is not involved. *Genetics* 90:735-760.



954 Sasse C, Dunkel N, Schafer T, Schneider S, Dierolf F, Ohlsen K, Morschhauser J. 2012. The  
955 stepwise acquisition of fluconazole resistance mutations causes a gradual loss of fitness in  
956 *Candida albicans*. *Mol Microbiol* 86:539-556.

957 Selmecki A, Gerami-Nejad M, Paulson C, Forche A, Berman J. 2008. An isochromosome confers  
958 drug resistance in vivo by amplification of two genes, ERG11 and TAC1. *Mol Microbiol* 68:624-  
959 641.

960 Sheltzer JM, Blank HM, Pfau SJ, Tange Y, George BM, Humpton TJ, Brito IL, Hiraoka Y, Niwa O,  
961 Amon A. 2011. Aneuploidy drives genomic instability in yeast. *Science* 333:1026-1030.

962 Synnott JM, Guida A, Mulhern-Haughey S, Higgins DG, Butler G. 2010. Regulation of the hypoxic  
963 response in *Candida albicans*. *Eukaryot Cell* 9:1734-1746.

964 Wistrand-Yuen E, Knopp M, Hjort K, Koskiniemi S, Berg OG, Andersson DI. 2018. Evolution of  
965 high-level resistance during low-level antibiotic exposure. *Nat Commun* 9:1599.

966 Xu Y, Lu H, Zhu S, Li WQ, Jiang YY, Berman J, Yang F. 2021. Multifactorial Mechanisms of  
967 Tolerance to Ketoconazole in *Candida albicans*. *Microbiol Spectr* 9:e0032121.

968 Yang F, Gritsenko V, Lu H, Zhen C, Gao L, Berman J, Jiang YY. 2021. Adaptation to Fluconazole  
969 via Aneuploidy Enables Cross-Adaptation to Amphotericin B and Flucytosine in *Cryptococcus*  
970 *neoformans*. *Microbiol Spectr* 9:e0072321.

971 Yang F, Gritsenko V, Slor Futterman Y, Gao L, Zhen C, Lu H, Jiang YY, Berman J. 2021.  
972 Tunicamycin Potentiates Antifungal Drug Tolerance via Aneuploidy in *Candida albicans*. *mBio*  
973 12:e0227221.

974 Yang F, Kravets A, Bethlenny G, Welle S, Rustchenko E. 2013. Chromosome 5 monosomy of  
975 *Candida albicans* controls susceptibility to various toxic agents, including major antifungals.  
976 *Antimicrob Agents Chemother* 57:5026-5036.

977 Yang F, Teoh F, Tan ASM, Cao Y, Pavelka N, Berman J. 2019. Aneuploidy Enables Cross-  
978 Adaptation to Unrelated Drugs. *Mol Biol Evol* 36:1768-1782.

979 Yang F, Todd RT, Selmecki A, Jiang YY, Cao YB, Berman J. 2021. The fitness costs and benefits of  
980 trisomy of each *Candida albicans* chromosome. *Genetics* 218.

981 Yona AH, Manor YS, Herbst RH, Romano GH, Mitchell A, Kupiec M, Pilpel Y, Dahan O. 2012.  
982 Chromosomal duplication is a transient evolutionary solution to stress. *Proc Natl Acad Sci U S A*  
983 109:21010-21015.

984

985

986

Table 1. Karyotypes of SC5314 adaptors from passaging experiment

| Passage number (day)                            | Selection pressure FLC (µg/ml) | Adaptor response | Number of sequenced adaptors                                           | Genome features*                                                                         |
|-------------------------------------------------|--------------------------------|------------------|------------------------------------------------------------------------|------------------------------------------------------------------------------------------|
| 1                                               | 2                              | Tolerance        | 5                                                                      | ChrRx3 (n=3);<br>ChrRx3+Chr4x3 (n=1);<br>segChrRx1 (from 1.89 Mb to right telomere, n=1) |
|                                                 | 128                            | Tolerance        | 2                                                                      | ChrRx3                                                                                   |
| 5                                               | 1                              | Tolerance        | 1                                                                      | ChrRx3                                                                                   |
|                                                 |                                | Resistance       | 4                                                                      | Euploid                                                                                  |
|                                                 | 0.25                           | Tolerance        | 1                                                                      | ChrRx3                                                                                   |
|                                                 |                                | Resistance       | 5                                                                      | Euploid                                                                                  |
| 10                                              | 0.5                            | Tolerance        | 3                                                                      | SegChrRx3 (from left telomere to 1.89MB, n=2);<br>ChrRx3 +Chr7x3+Chr4x3 (n=1)            |
|                                                 |                                | Resistance       | 3                                                                      | Chr5x3                                                                                   |
|                                                 | 1                              | Tolerance        | 3                                                                      | ChrRx3+Chr4x3 (n=1);<br>ChrRx3+Chr6x3 (n=1);<br>Chr6x3 (n=1)                             |
|                                                 |                                | Resistance       | 3                                                                      | Euploid                                                                                  |
| 15                                              | 2                              | Tolerant         | 6                                                                      | ChrRx3+Chr4x3 (n=4);<br>ChrRx3+Chr4x3+Chr2x3 (n=1);<br>ChrRx3+Chr4x3+Chr6x3 (n=1)        |
|                                                 | 128                            | Tolerance        | 6                                                                      | ChrRx3+Chr4x3                                                                            |
|                                                 | 0.25                           | Resistance       | 6                                                                      | Euploid<br>Chr5x3 (n=2);                                                                 |
|                                                 | 0.5                            | Resistance       | 6                                                                      | Chr7x3 (n=1);<br>Euploid (n=3)                                                           |
|                                                 |                                |                  |                                                                        | Chr3x3 (n=2);                                                                            |
|                                                 | 1                              | Resistance       | 6                                                                      | Chr7x3 (n=3);<br>Chr7x3+Chr6x3 (n=1)                                                     |
| SegChrRx3 (from left telomere to 1.89 MB, n=2); |                                |                  |                                                                        |                                                                                          |
| 128                                             | Tolerance                      | 6                | ChrRx3 (n=2);<br>ChrRx3+Chr4x3 (n=2)                                   |                                                                                          |
|                                                 |                                |                  | SegChrRx3 (from left telomere to 1.89 MB, n=1);<br>ChrRx3+Chr4x3 (n=5) |                                                                                          |

987 \*See Fig. 7 and Fig. S6 for Ymap views of the karyotypes. Annotation such as “x3”  
988 indicates trisomy, “+” indicates additional aneuploidy in the same adaptor. n, number of  
989 isolates with this karyotype.

990

991

# Figure 1

## A

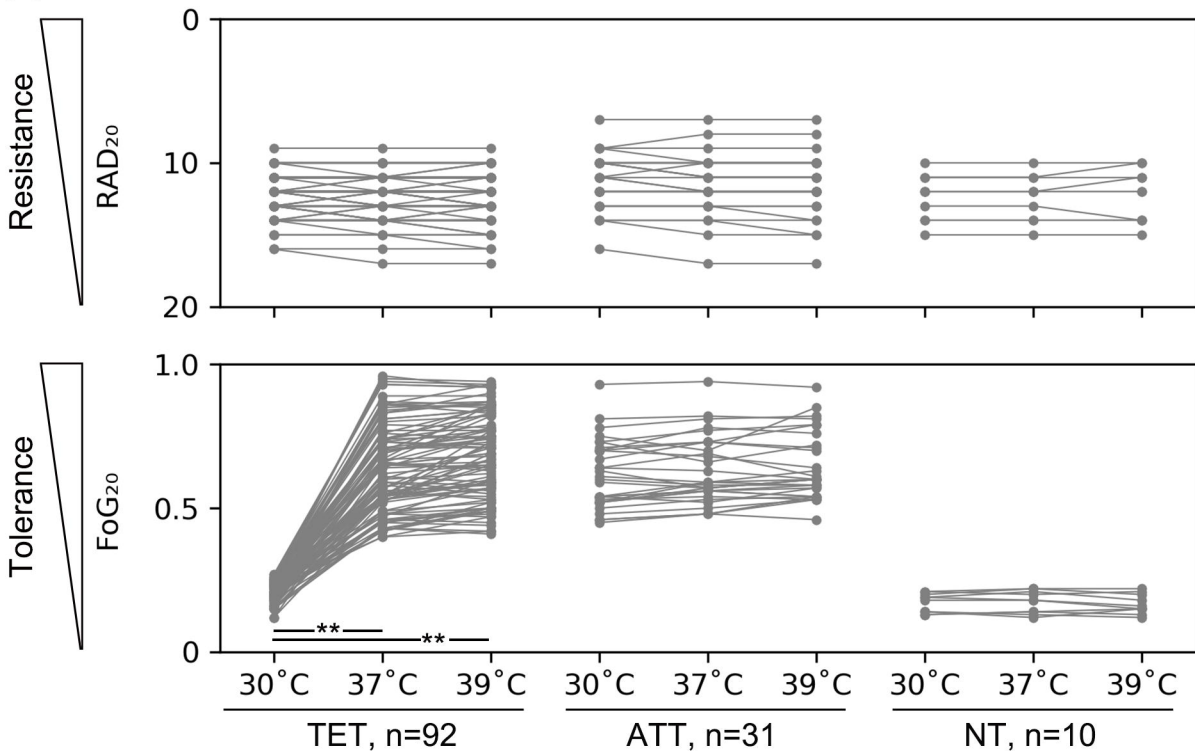

## B

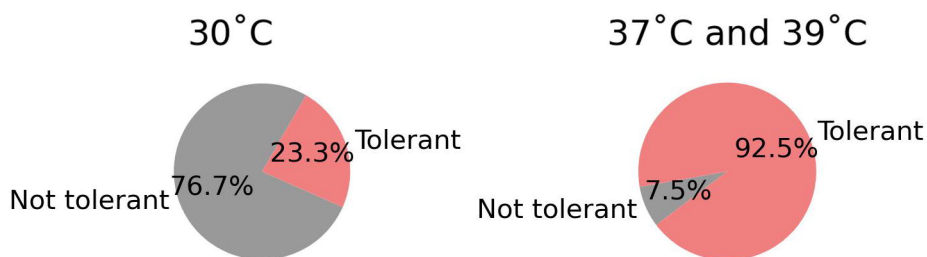

**Figure 2****A**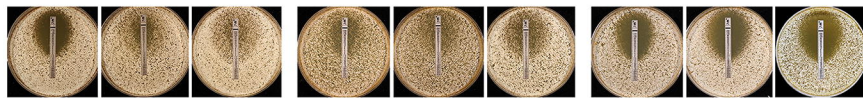**B**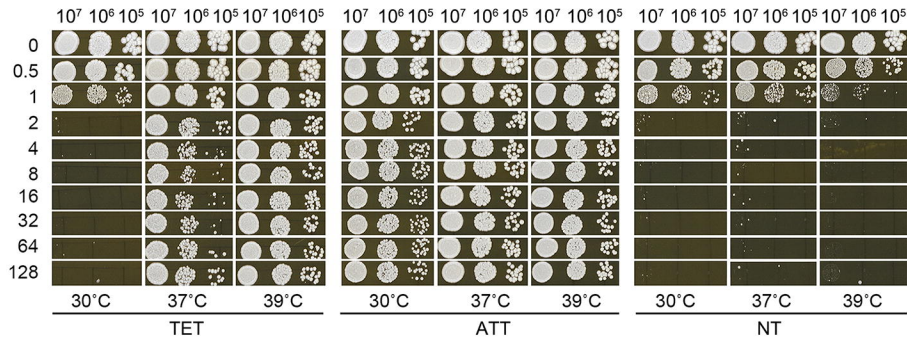**C**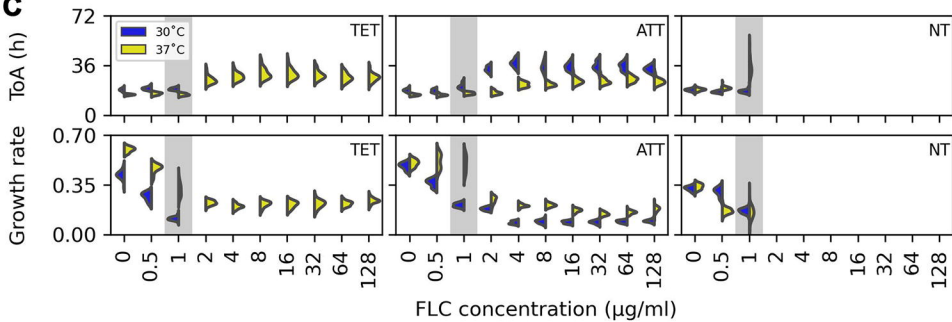

# Figure 3

TET parent selected at 30°C

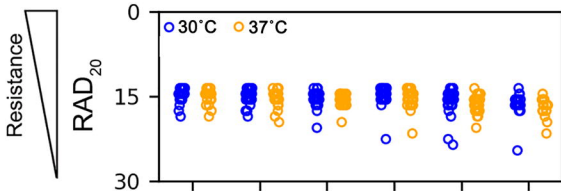

TET parent selected at 30°C

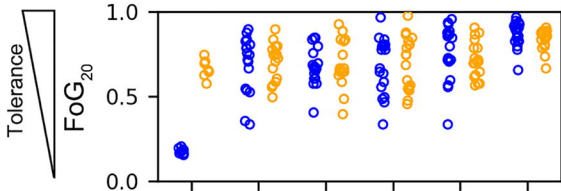

NT parent selected at 30°C

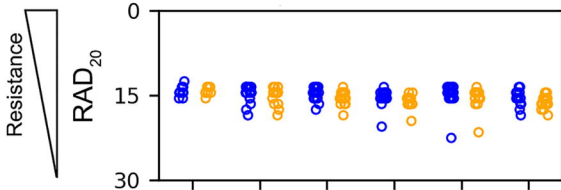

NT parent selected at 30°C

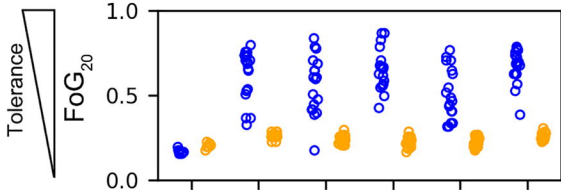

NT parent selected at 37°C

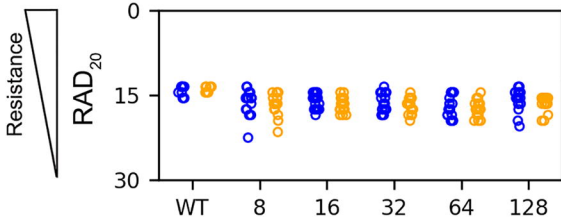

NT parent selected at 37°C

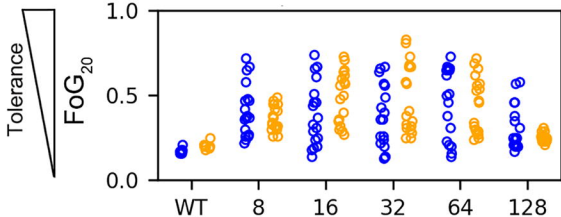

FLC (μg/ml) adaptors

FLC (μg/ml) adaptors

# Figure 4

## A

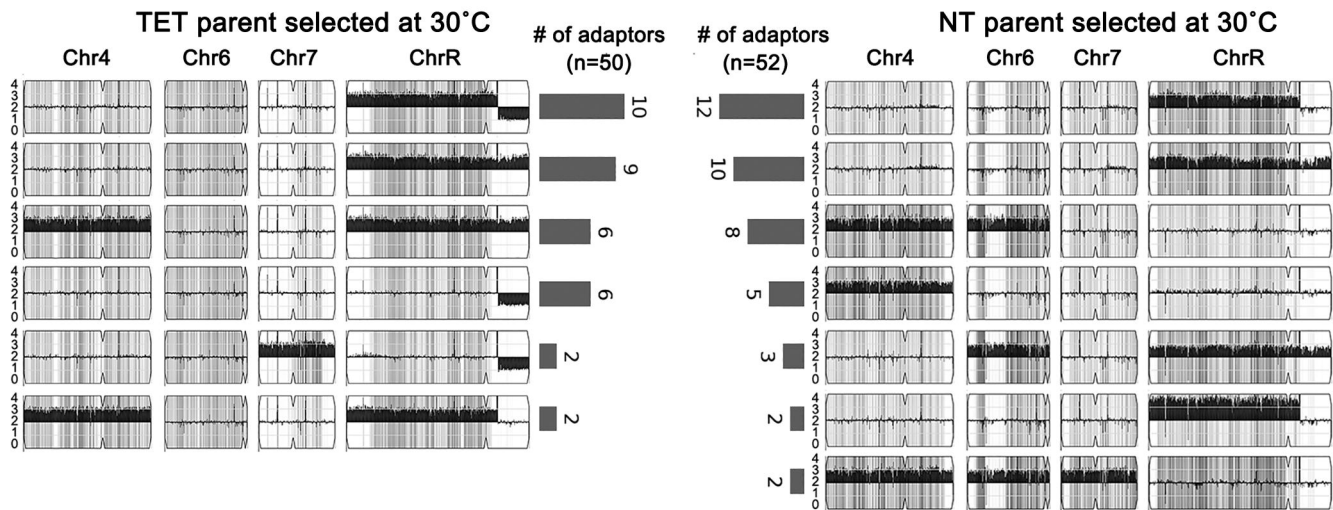

## B

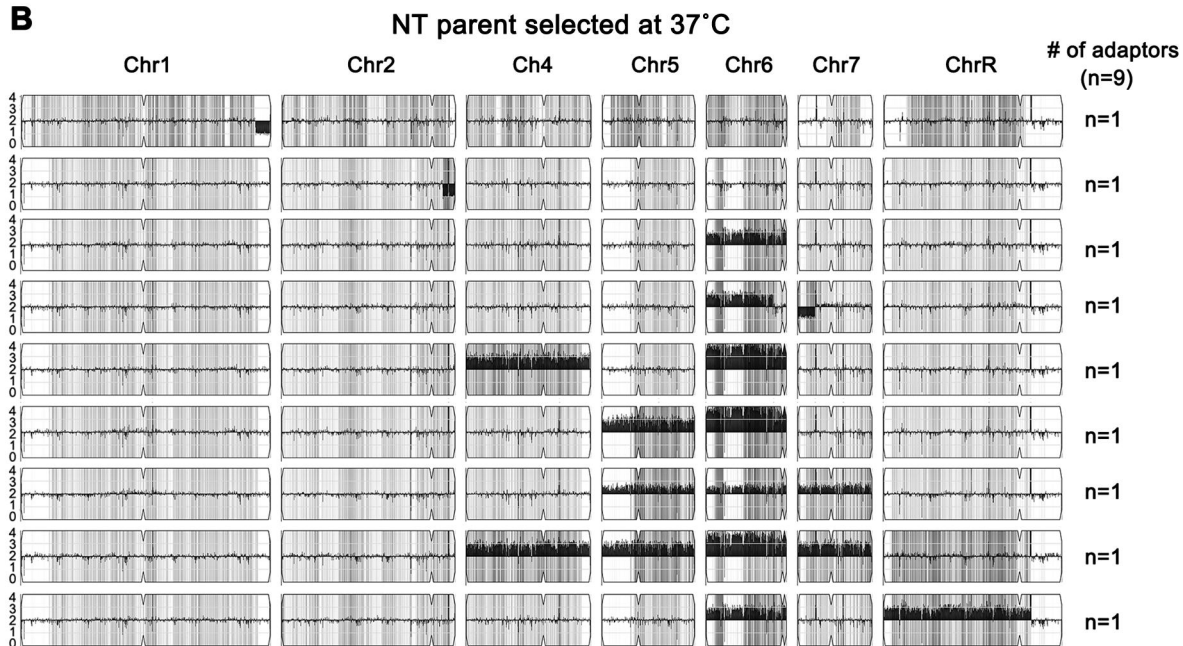

# Figure 5

**A**

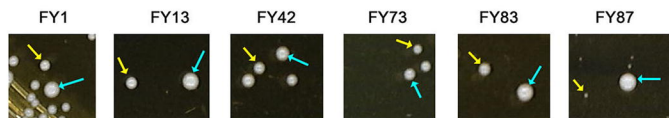

**B**

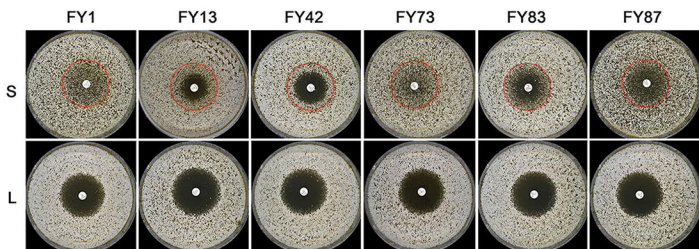

**C**

A AB B AAB ABB

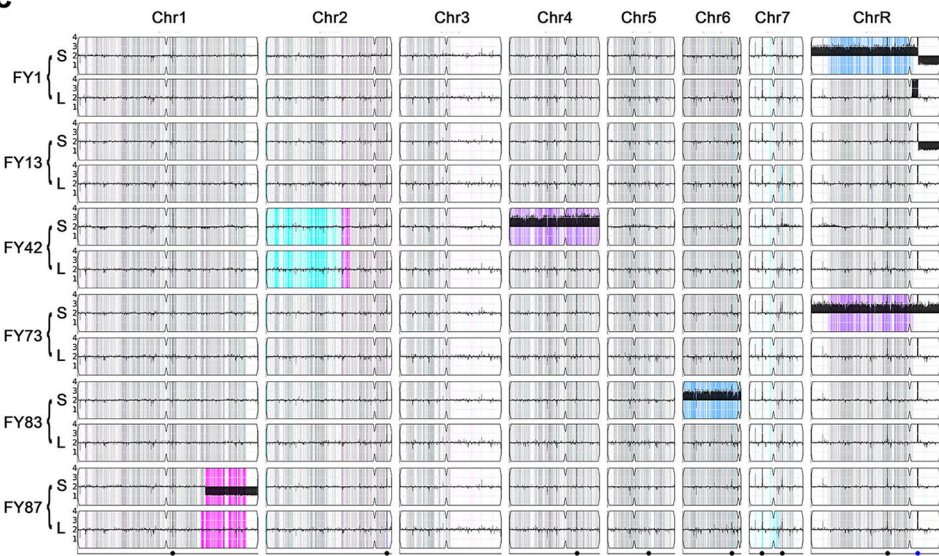



# Figure 6

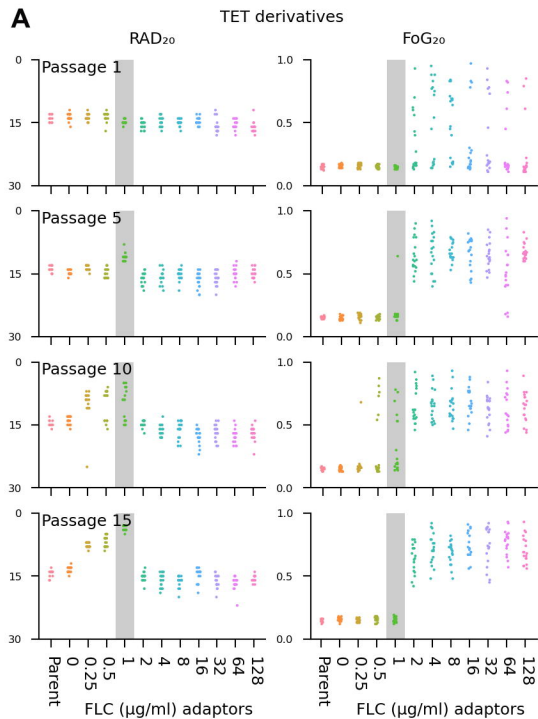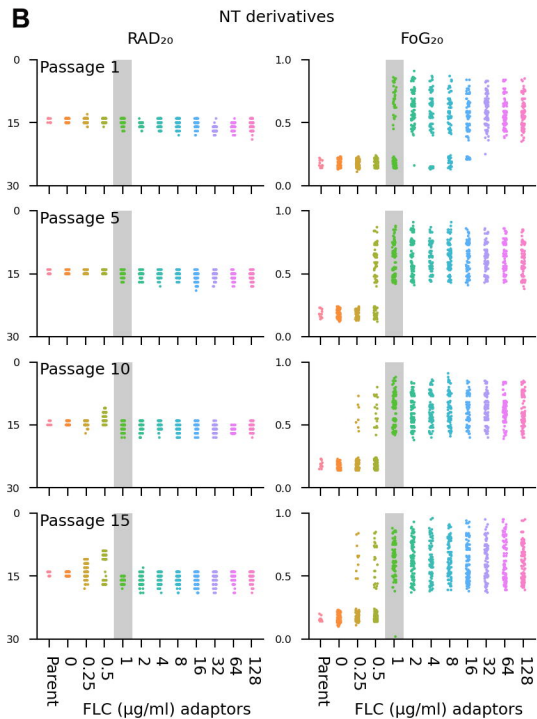

**Figure 7**

FLC-resistant adaptors (n=34)

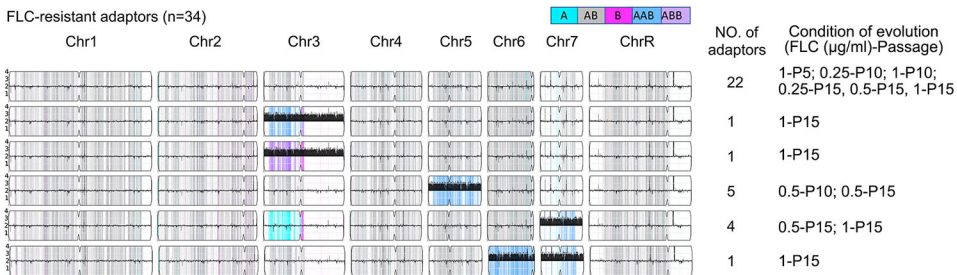

FLC-tolerant adaptors (n=39)

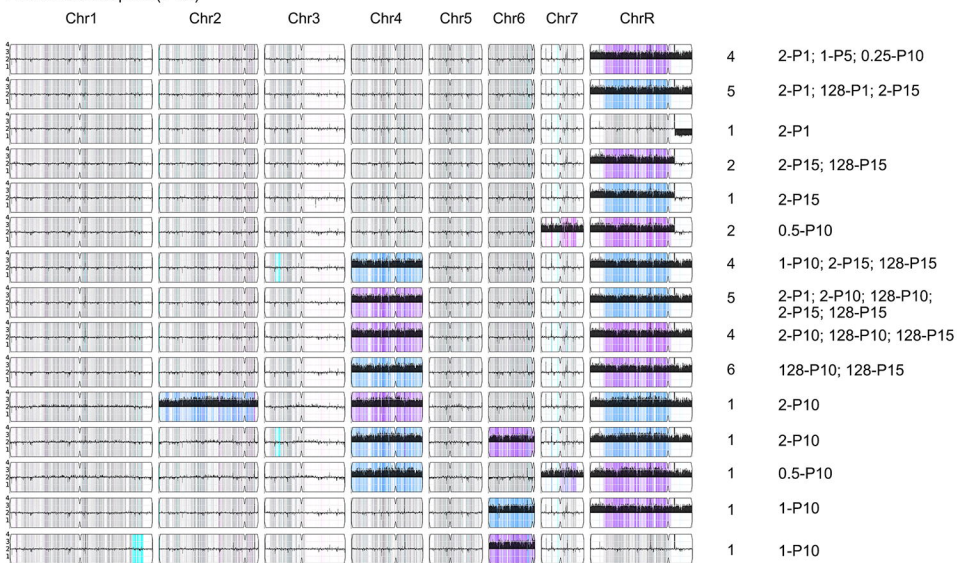

Source: https://www.biorxiv.org/content/10.1101/2022.11.30.518455v1.full.pdf
